# Supplementary material for: Association between sleep–wake habits and use of health care services of middle-aged and elderly adults in China
Source: publisher site journal article supplement (doi:10.18632/aging.102860), 2020-02-24
Supplement: Supplementary file [file aging-v12i4-102860-supplementary-material-SD1.pdf]

## SUPPLEMENTARY TABLE

Supplementary Table 1. The association between sleep–wake habits and the use of health care services (crude models).

| Sleep–Wake Habits        | Physician Visits OR(95%CI) | Hospitalization OR(95%CI) |
|--------------------------|----------------------------|---------------------------|
| <b>Total</b>             |                            |                           |
| EE                       | 1.00(reference)            | 1.00(reference)           |
| EL                       | 1.08(0.98,1.18)            | 1.11(1.01,1.22)           |
| LE                       | 1.06(1.01,1.11)            | 0.84(0.80,0.88)           |
| LL                       | 1.09(1.02,1.17)            | 0.81(0.75,0.87)           |
| <b>Male</b>              |                            |                           |
| EE                       | 1.00(reference)            | 1.00(reference)           |
| EL                       | 1.11(0.97,1.27)            | 1.16(1.01,1.32)           |
| LE                       | 1.08(1.01,1.16)            | 0.85(0.79,0.91)           |
| LL                       | 1.12(1.01,1.25)            | 0.80(0.72,0.89)           |
| <b>Female</b>            |                            |                           |
| EE                       | 1.00(reference)            | 1.00(reference)           |
| EL                       | 1.05(0.92,1.19)            | 1.07(0.94,1.22)           |
| LE                       | 1.02(0.96,1.09)            | 0.84(0.79,0.89)           |
| LL                       | 1.06(0.97,1.16)            | 0.81(0.74,0.89)           |
| <b>Age &lt; 60 years</b> |                            |                           |
| EE                       | 1.00(reference)            | 1.00(reference)           |
| EL                       | 1.10(0.93,1.31)            | 1.06(0.88,1.28)           |
| LE                       | 1.18(1.08,1.30)            | 0.98(0.88,1.08)           |
| LL                       | 1.27(1.14,1.43)            | 1.00(0.88,1.14)           |
| <b>Age=60-69 years</b>   |                            |                           |
| EE                       | 1.00(reference)            | 1.00(reference)           |
| EL                       | 1.11(0.95,1.28)            | 1.18(1.01,1.37)           |
| LE                       | 1.16(1.08,1.24)            | 0.91(0.85,0.98)           |
| LL                       | 1.27(1.14,1.41)            | 0.87(0.78,0.97)           |
| <b>Age ≥ 70 years</b>    |                            |                           |
| EE                       | 1.00(reference)            | 1.00(reference)           |
| EL                       | 1.17(0.98,1.40)            | 1.24(1.06,1.46)           |
| LE                       | 1.13(1.02,1.24)            | 0.90(0.82,0.98)           |
| LL                       | 1.26(1.06,1.50)            | 1.00(0.86,1.17)           |

EE: Early-bed/Early-rise; EL: Early-bed/Late-rise; LE: Late-bed/ Early-rise; LL: Late-bed/Late-rise.
